# Supplementary material
Source: PubMed Central journal article supplement (PMC6643822)
Supplement: ao7b00612_si_001.pdf [file ao7b00612_si_001.pdf]

Asymmetric structure of the dimerization domain of  
PhoR, a sensor kinase important for the virulence of  
*Mycobacterium tuberculosis*

Daniel Xing<sup>†§</sup>, Michelle B. Ryndak<sup>‡¶</sup>, Liqin Wang<sup>†</sup>, Irina Kolesnikova<sup>‡</sup>, Issar Smith<sup>‡</sup>, and Shuishu  
Wang<sup>†\*</sup>

<sup>†</sup>Department of Biochemistry and Molecular Biology, Uniformed Services University of the  
Health Sciences, 4301 Jones Bridge Road, Bethesda, Maryland 20814; <sup>‡</sup>Public Health Research  
Institute Center, New Jersey Medical School, Rutgers, The State University of New Jersey, 225  
Warren Street, Newark, New Jersey 07103, USA

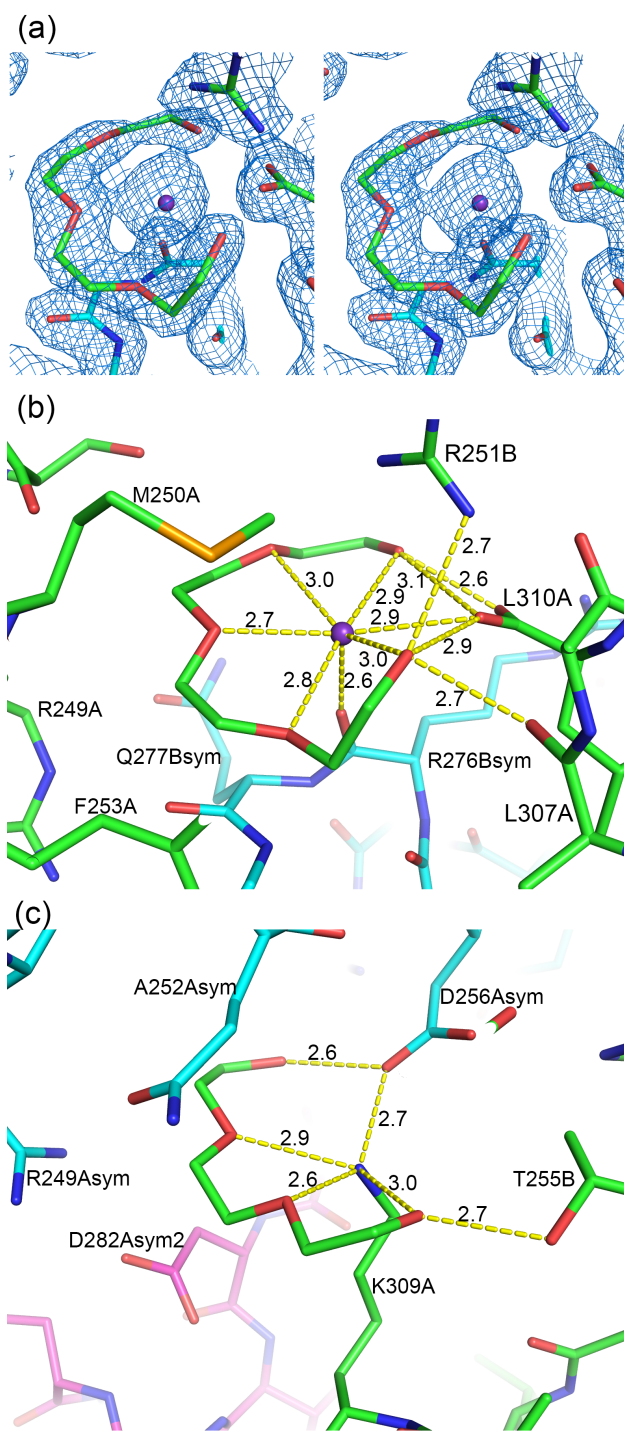

**Figure S1.** Fragments of PEG identified in the crystal structure. (a) Stereo view of the electron density of a tetraethylene glycol encircling a K<sup>+</sup> ion. The electron density was contoured at 1  $\sigma$ . Crystallographic-symmetry related PhoRD molecules are shown with different colors (same for other panels). (b) Binding interactions of the tetraethylene glycol molecule. Distances of the

glycol molecule to the  $K^+$  and hydrogen bonds to the protein are marked with dashed lines. The ethylene groups had hydrophobic interactions with the protein, while the oxygen atoms interacted with the cation in the center. Terminal oxygen atoms of the tetraethylene glycol also have hydrogen bonds to protein side chains. (c) Binding interactions of a bound triethylene glycol with the protein. This figure was prepared from the structural coordinates derived from the SeMet-labeled crystal. The native structure has similar binding of PEG fragments.

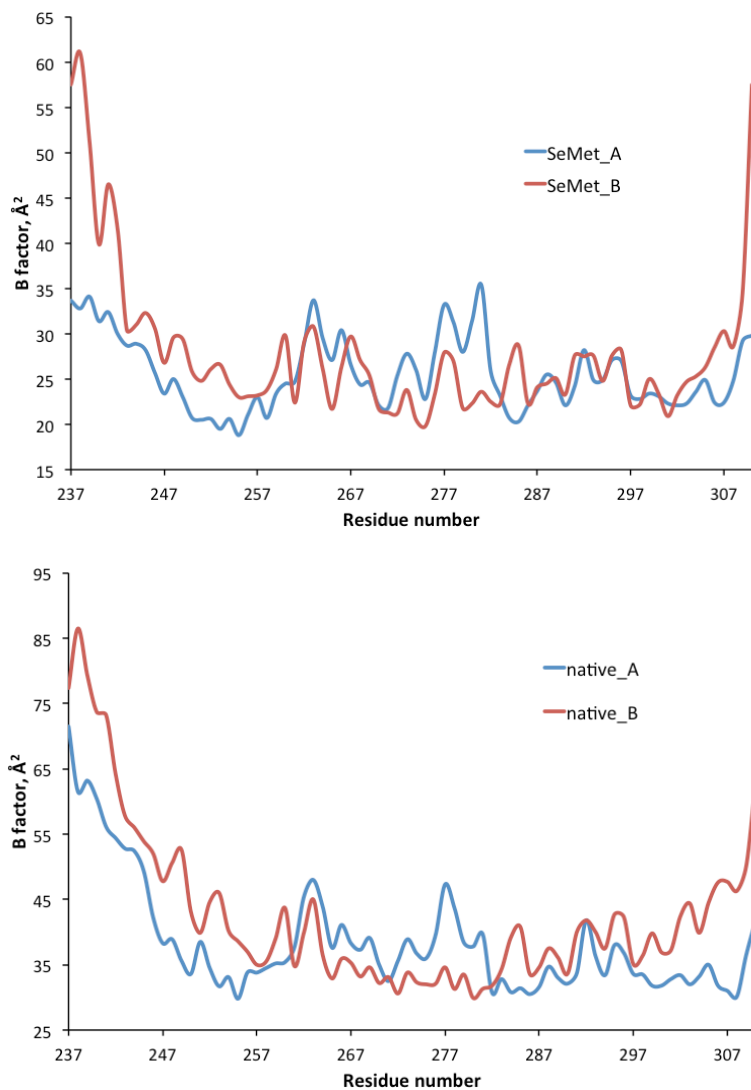

**Figure S2.** Plots of average B factors of main chain atoms of the structural models from the SeMet (top) and the native data (bottom). The curves for chain A of both structures are shown in blue, and those for chain B are in red. For each structure, the two chains have slightly different profile, with chain B having a higher B factors near the termini and a higher overall average B factor. Despite the higher overall B factor in the native structure, however, the B factor profiles for chain A for both structures are similar, and so are those for chain B.

**Table S1. Analysis of interactions at the PhoRD dimer interface.** The PhoRD dimer structure was analyzed with PISA (ref: E.B. Krissinel and K. Henrick Inference of macromolecular assemblies from crystalline state, J.Mol.Biol. 2007, 372, 774-797). The output of the PISA analysis for the dimer interface includes three hydrogen bonds with distances that are longer than 3.7 Å. These hydrogen bonds are not included in the discussion of interface interactions in the paper. H represents hydrogen bonds; S represents salt bridges; ASA, accessible surface area; BSA, buried surface area; SE, solvation energy.

### 1. Interface Summary

|                            | Structure 1     | Structure 2     |
|----------------------------|-----------------|-----------------|
| Selection range            | subunit B       | subunit A       |
| Atoms in the interface     | 164 ( 28.1%)    | 159 ( 27.3%)    |
| Atoms on the surface       | 444 ( 76.2%)    | 447 ( 76.7%)    |
| Total atoms                | 583 (100.0%)    | 583 (100.0%)    |
| Residues in the interface  | 41 ( 55.4%)     | 41 ( 55.4%)     |
| Residues on the surface    | 74 (100.0%)     | 74 (100.0%)     |
| Total residues             | 74 (100.0%)     | 74 (100.0%)     |
| Buried ASA, Å <sup>2</sup> | 1630.1 ( 25.9%) | 1566.5 ( 24.3%) |
| Total ASA, Å <sup>2</sup>  | 6285.4 (100.0%) | 6445.8 (100.0%) |
| Solvation energy, kcal/mol | -43.4           | -43.9           |
| SE gain, kcal/mol          | -13.6           | -12.0           |

### 2. Hydrogen Bonds

| ## | Structure 1       | Dist. Å | Structure 2       |
|----|-------------------|---------|-------------------|
| 1  | B:SER 246 [ OG ]  | 2.8     | A:GLU 247 [ OE1 ] |
| 2  | B:ARG 276 [ NH1 ] | 3.0     | A:GLY 284 [ O ]   |
| 3  | B:ARG 251 [ NH1 ] | 2.9     | A:ALA 308 [ O ]   |
| 4  | B:ARG 251 [ NH1 ] | 2.7     | A:LEU 310 [ OXT ] |
| 5  | B:SER 246 [ OG ]  | 3.8     | A:ARG 251 [ NH2 ] |
| 6  | B:GLU 247 [ OE2 ] | 3.7     | A:GLU 247 [ N ]   |

|    |                   |     |                   |
|----|-------------------|-----|-------------------|
| 7  | B:GLU 247 [ OE2 ] | 2.5 | A:SER 246 [ OG ]  |
| 8  | B:LEU 307 [ O ]   | 3.8 | A:ARG 251 [ NH1 ] |
| 9  | B:ALA 308 [ O ]   | 2.9 | A:ARG 251 [ NH1 ] |
| 10 | B:LEU 310 [ O ]   | 2.8 | A:ARG 251 [ NH1 ] |

### 3. Salt Bridges

| ## | Structure 1       | Distance, Å | Structure 2       |
|----|-------------------|-------------|-------------------|
| 1  | B:ARG 276 [ NE ]  | 2.8         | A:GLU 291 [ OE1 ] |
| 2  | B:ARG 276 [ NH1 ] | 3.0         | A:GLU 291 [ OE1 ] |
| 3  | B:ARG 262 [ NE ]  | 2.8         | A:ASP 302 [ OD1 ] |
| 4  | B:ARG 262 [ NH1 ] | 2.9         | A:ASP 302 [ OD1 ] |
| 5  | B:ARG 262 [ NH1 ] | 3.7         | A:ASP 302 [ OD2 ] |
| 6  | B:GLU 291 [ OE1 ] | 3.1         | A:ARG 276 [ NE ]  |
| 7  | B:GLU 291 [ OE1 ] | 3.4         | A:ARG 276 [ NH2 ] |
| 8  | B:GLU 291 [ OE2 ] | 2.9         | A:ARG 276 [ NE ]  |
| 9  | B:ASP 302 [ OD1 ] | 3.1         | A:ARG 262 [ NH1 ] |
| 10 | B:ASP 302 [ OD1 ] | 3.5         | A:ARG 262 [ NE ]  |

### 4. Interfacing Residues: Structure 1

| Residues  | HS | ASA, Å <sup>2</sup> | BSA, Å <sup>2</sup> | ΔG, kcal/mol |
|-----------|----|---------------------|---------------------|--------------|
| B:GLY 237 |    | 98.51               | 12.10               | -0.14        |
| B:MSE 239 |    | 162.75              | 25.48               | 0.39         |
| B:ALA 240 |    | 66.68               | 49.47               | 0.65         |
| B:ALA 243 |    | 65.19               | 59.60               | 0.83         |
| B:ARG 244 |    | 133.51              | 5.41                | 0.07         |
| B:SER 246 | H  | 49.98               | 20.55               | -0.05        |
| B:GLU 247 | H  | 75.95               | 52.55               | 0.02         |
| B:MSE 250 |    | 79.21               | 73.27               | 1.76         |
| B:ARG 251 | H  | 147.60              | 61.47               | -0.77        |
| B:ILE 254 |    | 93.09               | 89.05               | 1.42         |
| B:THR 255 |    | 54.62               | 31.91               | 0.17         |
| B:SER 258 |    | 56.26               | 55.35               | 0.32         |
| B:HIS 259 |    | 117.15              | 22.09               | 0.05         |
| B:LEU 261 |    | 33.46               | 33.13               | 0.53         |
| B:ARG 262 | S  | 163.26              | 55.70               | -0.59        |
| B:LEU 265 |    | 97.33               | 85.16               | 1.27         |
| B:ILE 268 |    | 41.59               | 36.11               | 0.58         |
| B:ARG 269 |    | 181.29              | 6.13                | 0.07         |
| B:ALA 272 |    | 33.17               | 31.12               | 0.49         |
| B:GLU 273 |    | 106.36              | 3.13                | 0.01         |
| B:TYR 275 |    | 38.23               | 1.69                | 0.03         |
| B:ARG 276 | HS | 211.38              | 82.58               | -1.31        |
| B:VAL 283 |    | 94.34               | 24.46               | 0.39         |

|           |   |        |       |       |
|-----------|---|--------|-------|-------|
| B:GLY 284 |   | 48.83  | 20.82 | 0.23  |
| B:LEU 286 |   | 17.31  | 12.11 | 0.19  |
| B:LEU 287 |   | 96.39  | 92.89 | 1.43  |
| B:SER 288 |   | 57.89  | 10.26 | 0.07  |
| B:ILE 290 |   | 47.64  | 46.81 | 0.75  |
| B:GLU 291 | S | 127.40 | 80.57 | -0.25 |
| B:ALA 294 |   | 48.73  | 48.73 | 0.59  |
| B:SER 295 |   | 70.64  | 27.22 | 0.33  |
| B:MSE 297 |   | 32.61  | 32.61 | 0.75  |
| B:GLY 298 |   | 35.57  | 22.35 | 0.34  |
| B:VAL 301 |   | 65.43  | 64.93 | 1.04  |
| B:ASP 302 | S | 85.80  | 19.87 | -0.15 |
| B:LEU 304 |   | 39.16  | 34.64 | 0.48  |
| B:LEU 305 |   | 113.31 | 96.37 | 1.54  |
| B:LEU 307 | H | 49.15  | 5.26  | 0.08  |
| B:ALA 308 | H | 70.09  | 52.40 | 0.35  |
| B:LYS 309 |   | 162.02 | 18.49 | -0.09 |
| B:LEU 310 | H | 182.48 | 26.24 | -0.22 |

#### 5. Interfacing Residues: Structure 2

| Residues  | HS | ASA, Å <sup>2</sup> | BSA, Å <sup>2</sup> | ΔG, kcal/mol |
|-----------|----|---------------------|---------------------|--------------|
| A:MSE 239 |    | 152.88              | 28.16               | 0.44         |
| A:ALA 240 |    | 50.50               | 27.52               | 0.42         |
| A:ALA 243 |    | 60.98               | 43.65               | 0.56         |
| A:ARG 244 |    | 147.68              | 11.00               | 0.14         |
| A:SER 246 | H  | 69.58               | 23.33               | -0.12        |
| A:GLU 247 | H  | 77.11               | 61.58               | 0.29         |
| A:MSE 250 |    | 106.61              | 58.55               | 1.14         |
| A:ARG 251 | H  | 148.45              | 98.41               | -1.22        |
| A:PHE 253 |    | 74.45               | 5.88                | 0.09         |
| A:ILE 254 |    | 94.38               | 94.38               | 1.51         |
| A:THR 255 |    | 69.63               | 33.98               | 0.13         |
| A:ALA 257 |    | 7.93                | 3.35                | 0.05         |
| A:SER 258 |    | 54.20               | 54.08               | 0.31         |
| A:HIS 259 |    | 104.66              | 12.82               | -0.09        |
| A:LEU 261 |    | 34.86               | 34.53               | 0.55         |
| A:ARG 262 | S  | 151.07              | 50.74               | -0.52        |
| A:LEU 265 |    | 73.04               | 69.51               | 1.11         |
| A:ILE 268 |    | 33.62               | 33.62               | 0.54         |
| A:ARG 269 |    | 175.73              | 58.78               | -0.51        |
| A:ALA 272 |    | 52.00               | 51.51               | 0.75         |
| A:GLU 273 |    | 77.86               | 5.01                | -0.01        |
| A:TYR 275 |    | 126.30              | 65.20               | 0.41         |
| A:ARG 276 | S  | 192.12              | 44.08               | -0.56        |

|           |   |        |       |       |
|-----------|---|--------|-------|-------|
| A:VAL 283 |   | 62.85  | 23.69 | 0.38  |
| A:GLY 284 | H | 50.41  | 18.13 | 0.14  |
| A:LEU 286 |   | 19.63  | 4.19  | 0.07  |
| A:LEU 287 |   | 92.33  | 70.96 | 1.14  |
| A:SER 288 |   | 60.56  | 6.36  | 0.08  |
| A:ILE 290 |   | 34.50  | 34.50 | 0.55  |
| A:GLU 291 | S | 103.52 | 52.13 | -0.22 |
| A:ALA 294 |   | 49.32  | 35.29 | 0.44  |
| A:MSE 297 |   | 36.76  | 36.76 | 0.77  |
| A:GLY 298 |   | 31.04  | 13.07 | 0.20  |
| A:VAL 301 |   | 59.90  | 59.90 | 0.96  |
| A:ASP 302 | S | 83.09  | 33.63 | -0.28 |
| A:LEU 304 |   | 43.96  | 33.04 | 0.50  |
| A:LEU 305 |   | 113.84 | 91.33 | 1.45  |
| A:LEU 307 |   | 68.21  | 0.27  | -0.00 |
| A:ALA 308 | H | 73.44  | 54.61 | 0.40  |
| A:LYS 309 |   | 168.54 | 17.81 | 0.04  |
| A:LEU 310 | H | 181.70 | 11.12 | -0.07 |
